# Supplementary material for: Novel series of 1,2,4-trioxane derivatives as antimalarial agents
Source: PubMed Central journal article supplement (PMC6009891; doi:10.1080/14756366.2017.1363742), 2017-09-05
Supplement: IENZ_A_1363742_SM3028.pdf [file IENZ_A_1363742_SM3028.pdf]

# SUPPLEMENTARY MATERIALS

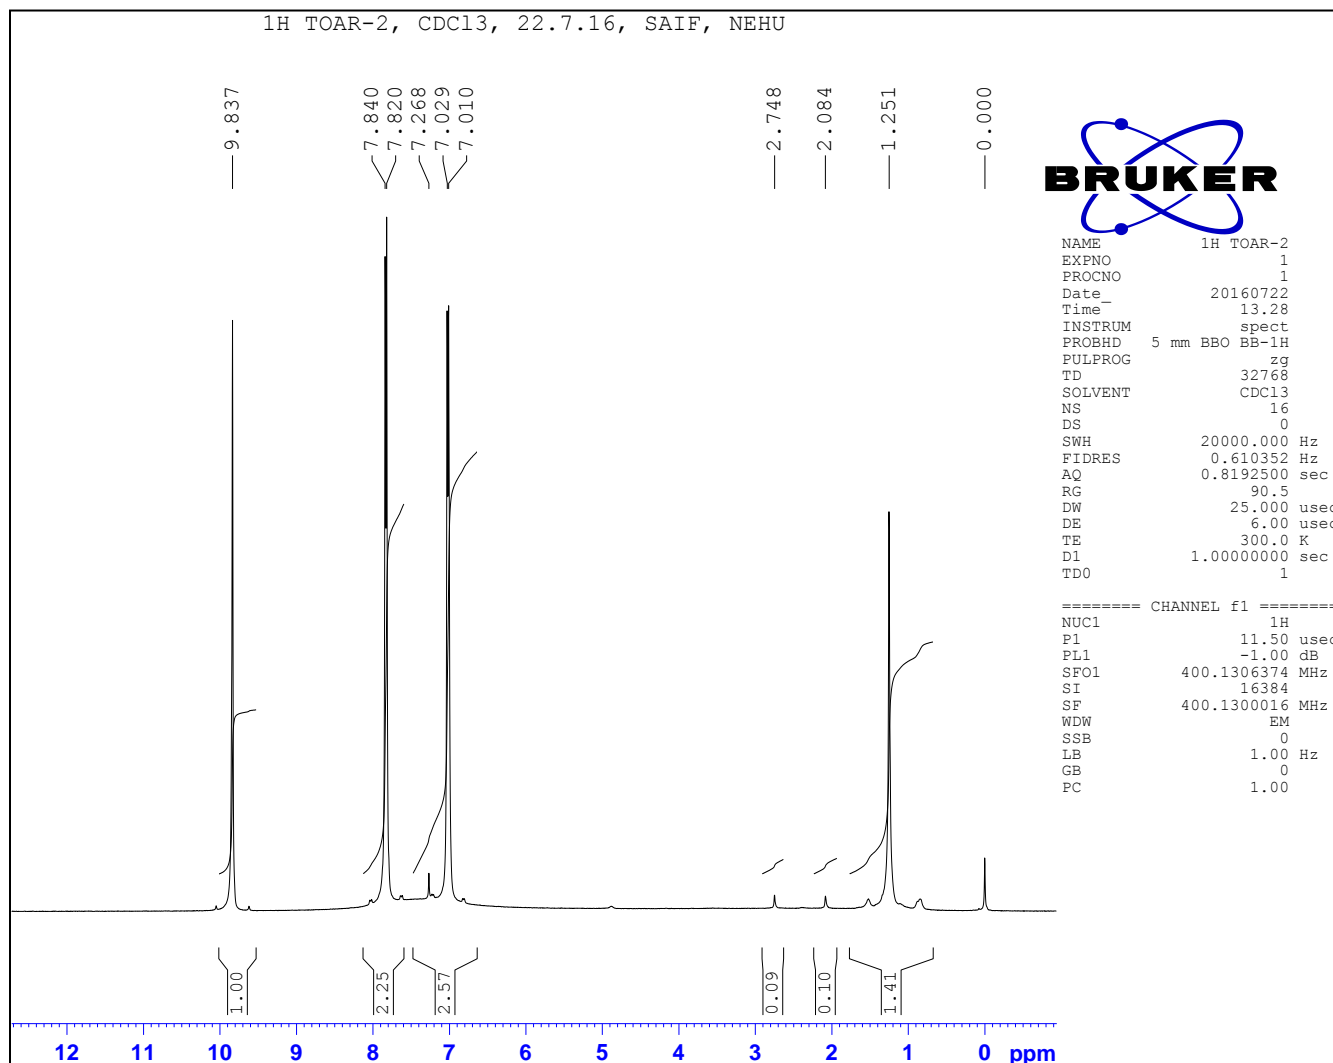

$^1\text{H}$  NMR spectrum of compound **3'b**

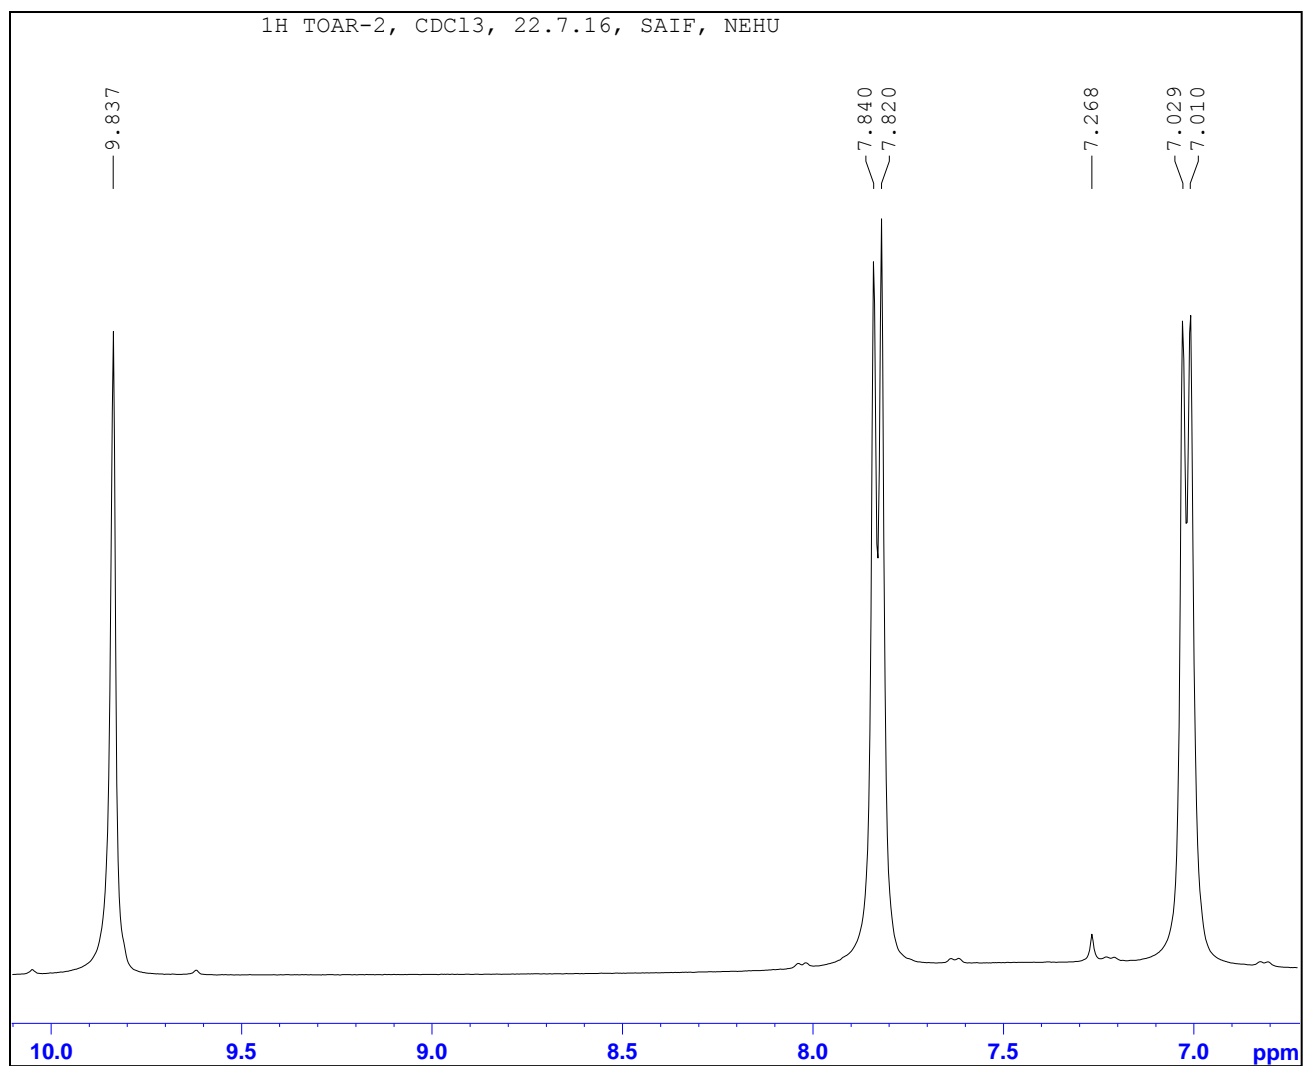

<sup>1</sup>H NMR spectrum of compound **3'b**

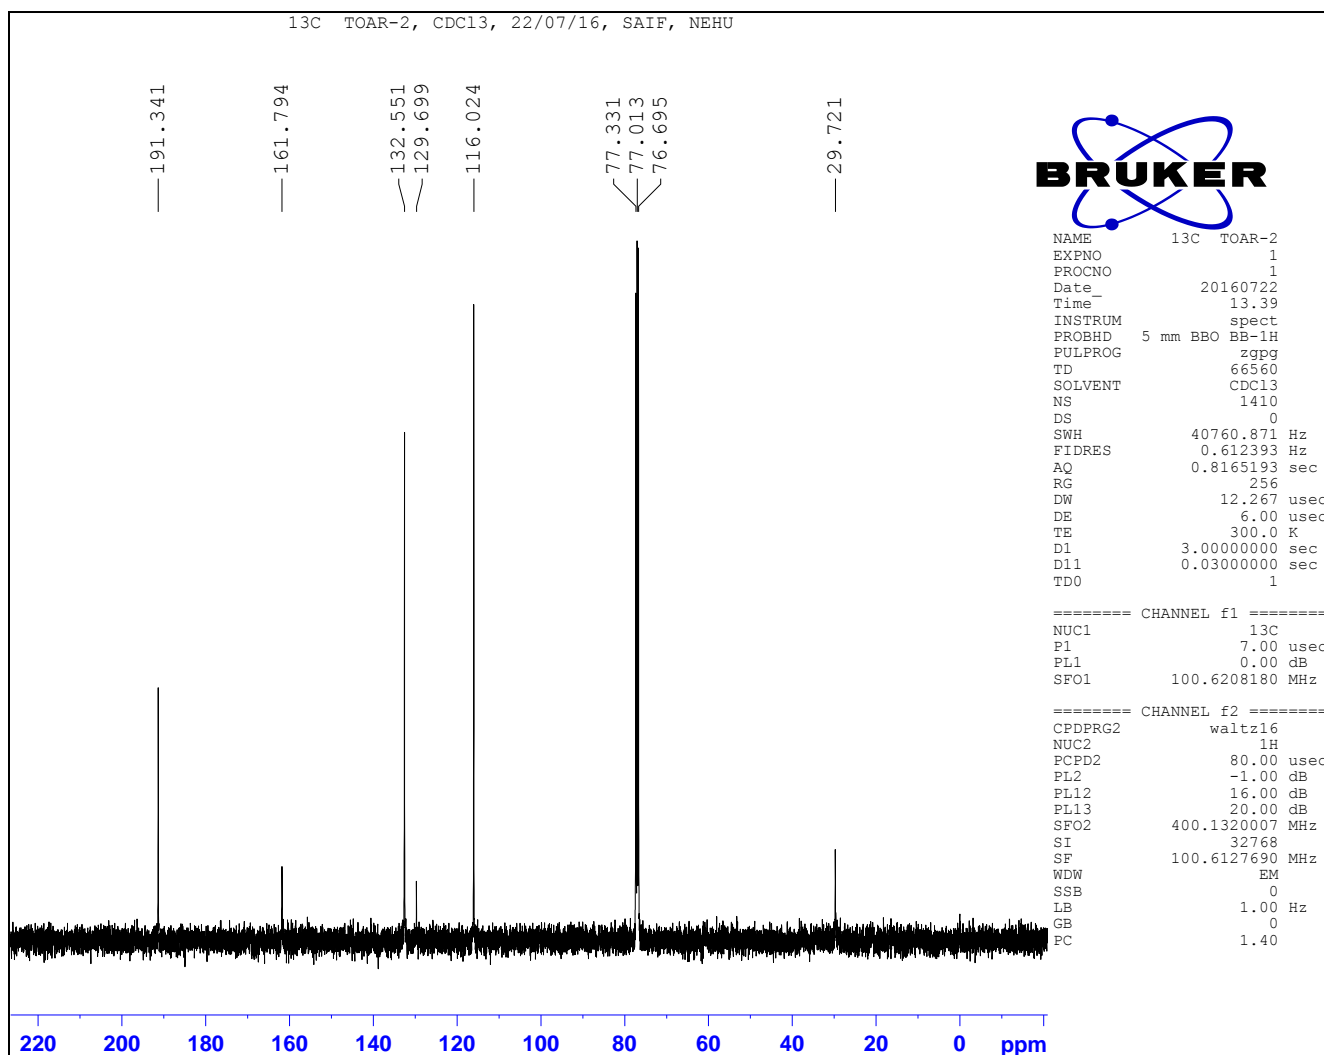

$^{13}\text{C}$  NMR spectrum of compound **3'b**

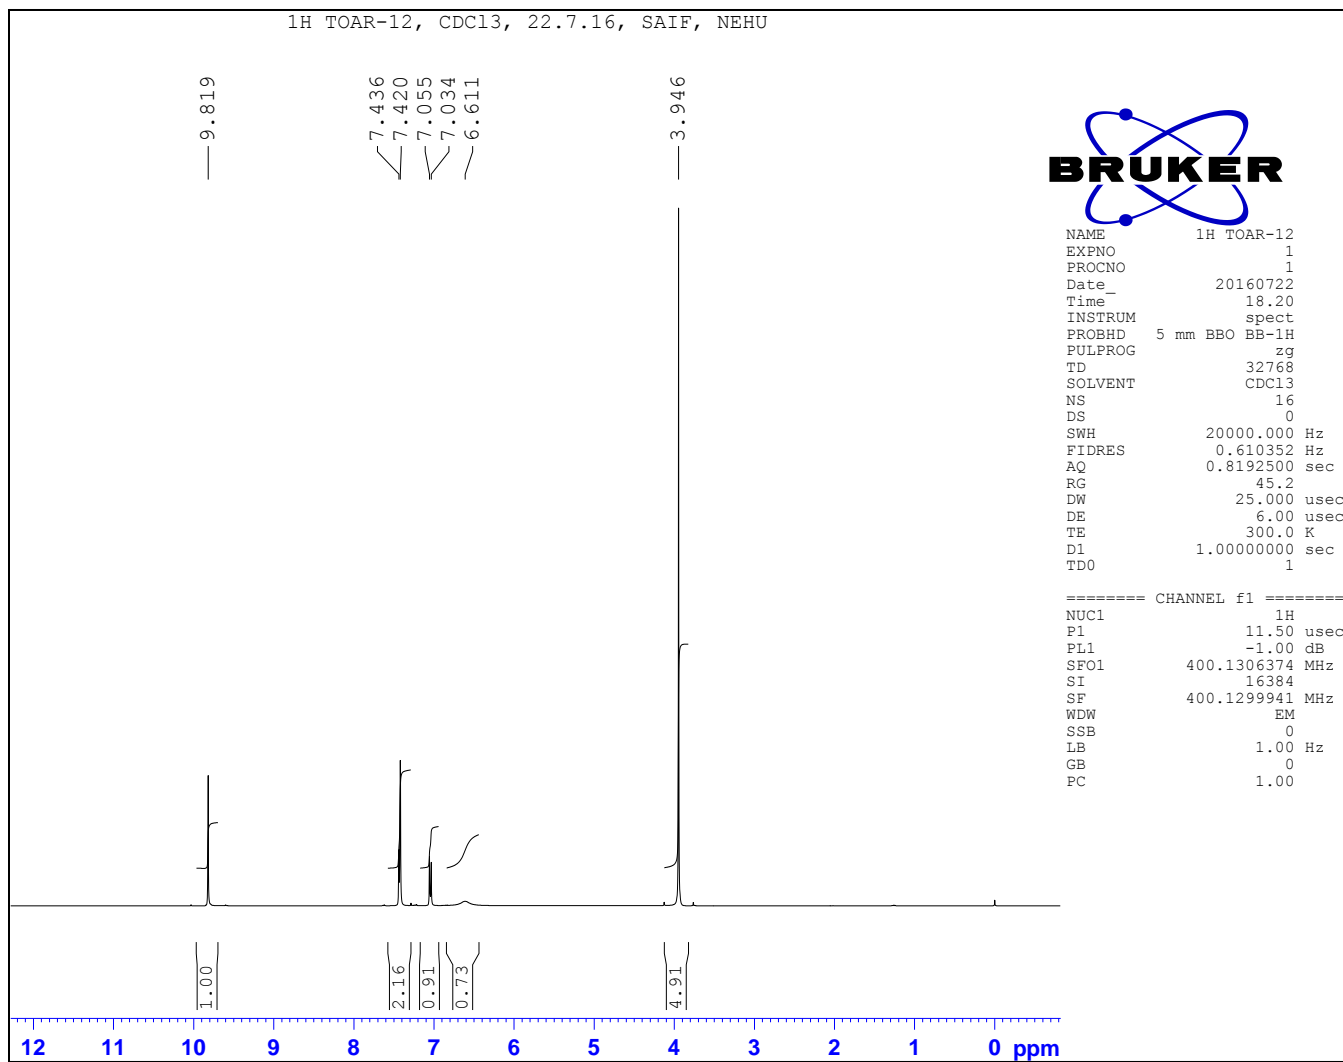

<sup>1</sup>H NMR spectrum of compound 3'1

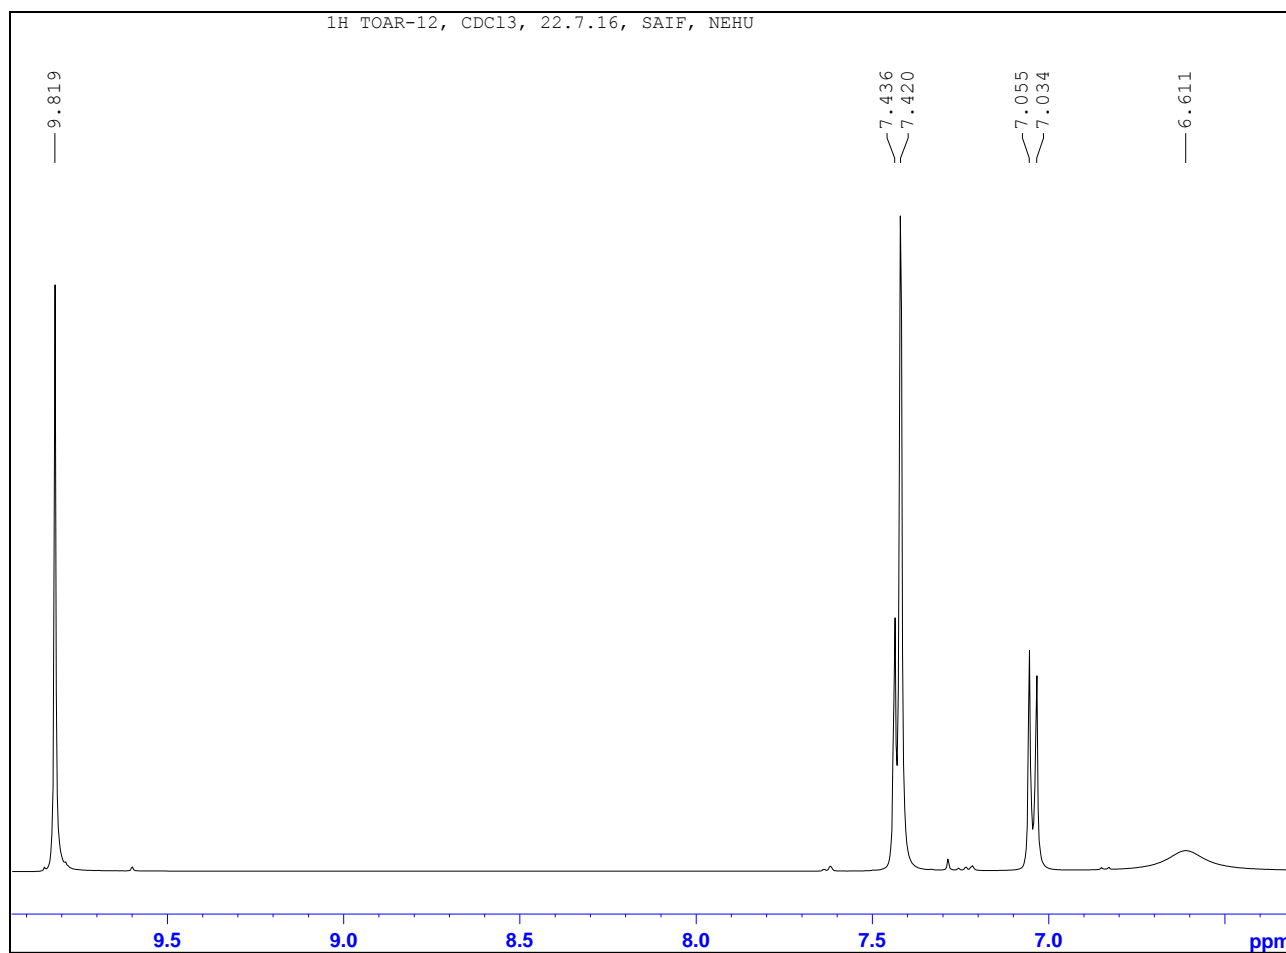

$^1\text{H}$  NMR spectrum of compound **3'1**

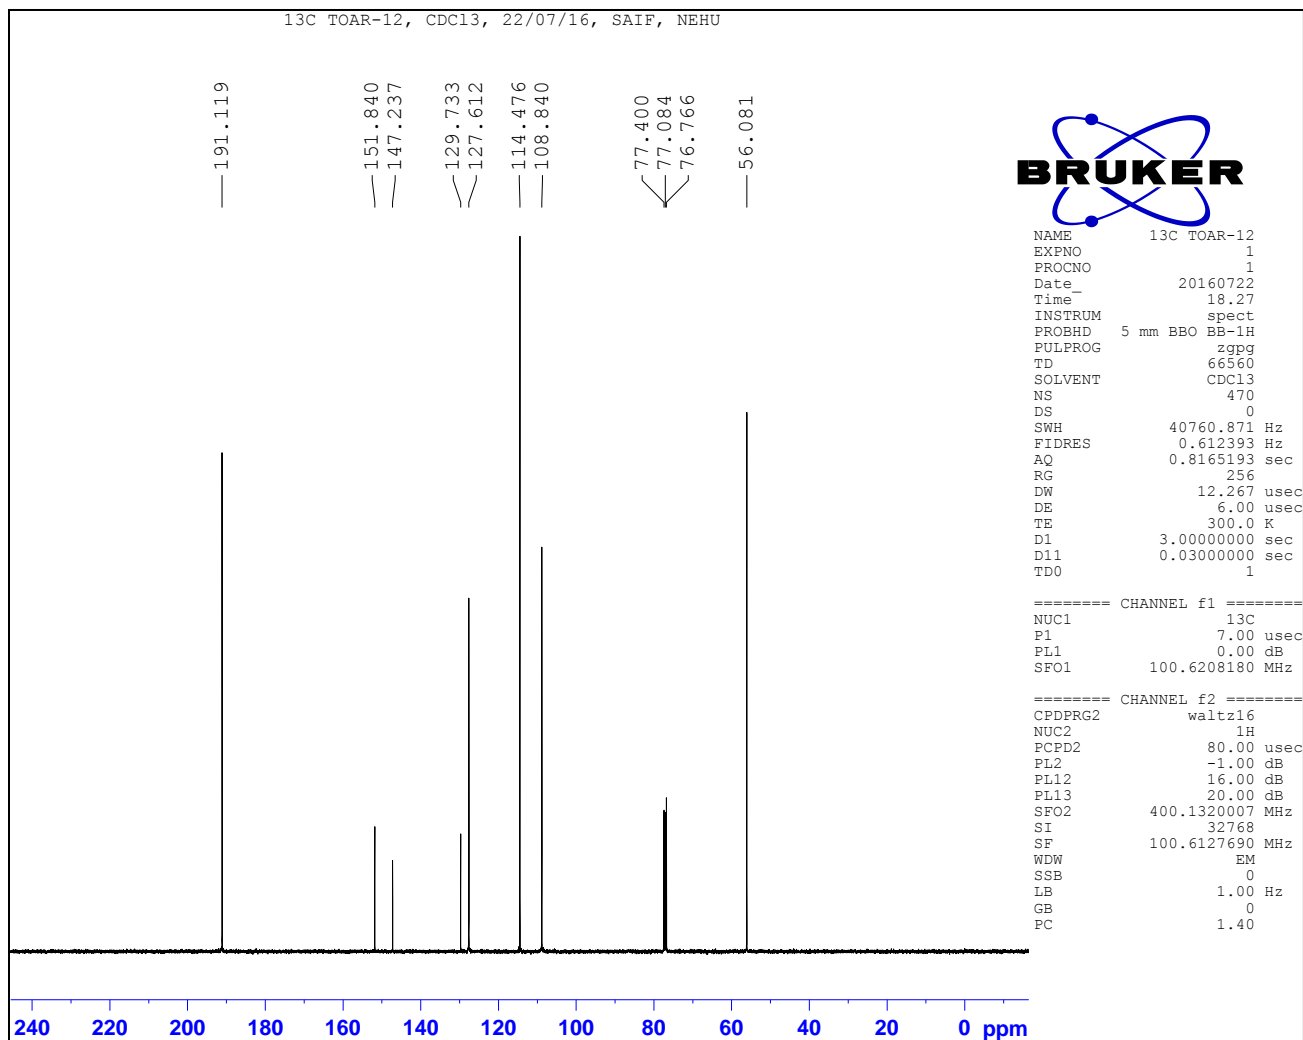

$^{13}\text{C}$  NMR spectrum of compound 3'1

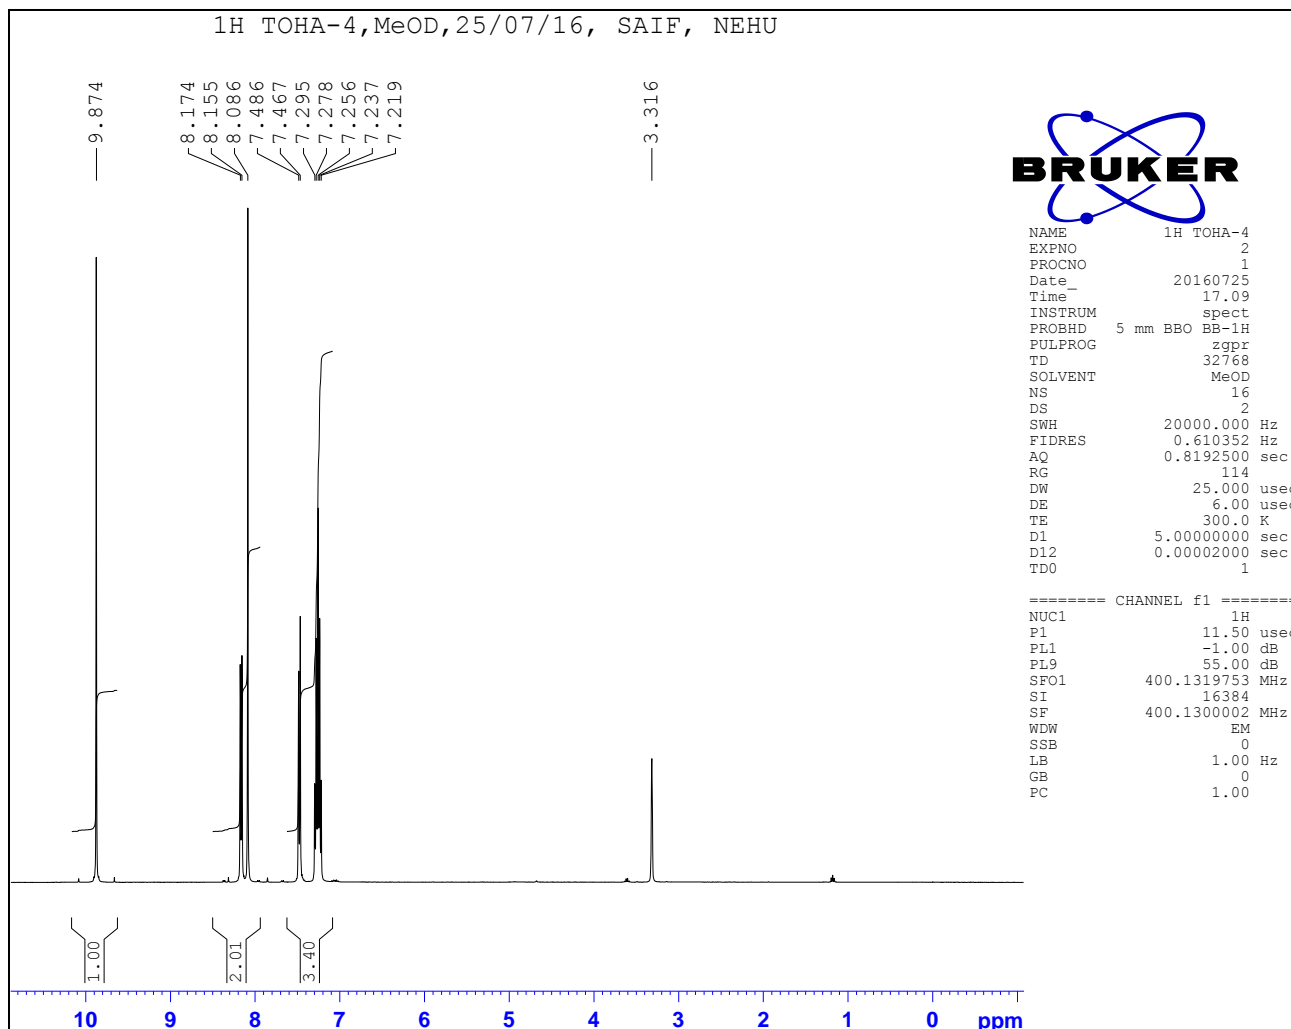

<sup>1</sup>H NMR spectrum of compound 3''d

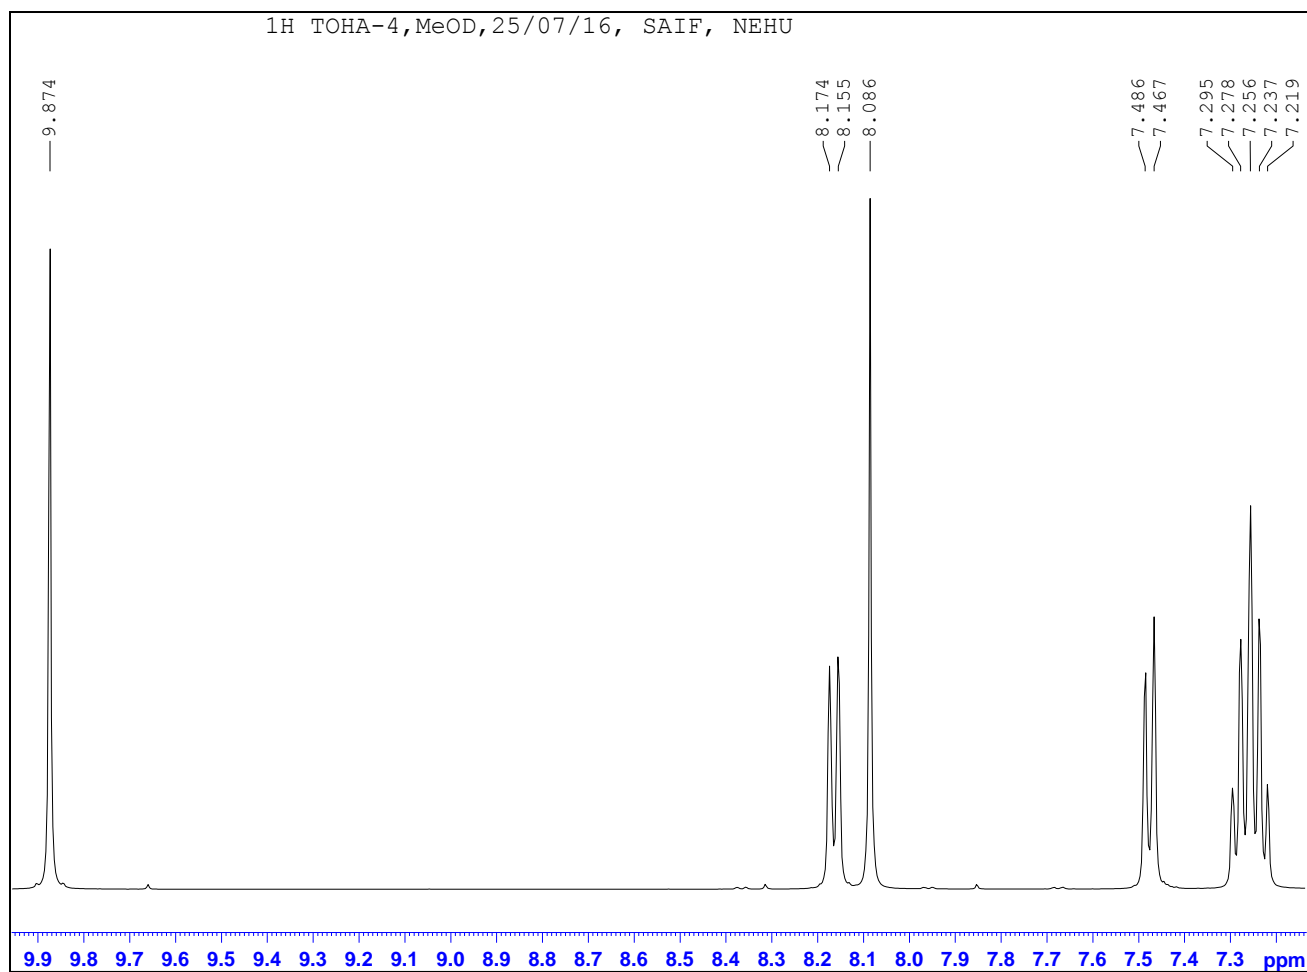

$^1\text{H}$  NMR spectrum of compound **3'd**



13C TOHA-4, MeOD, 25/07/16, SAIF, NEHU

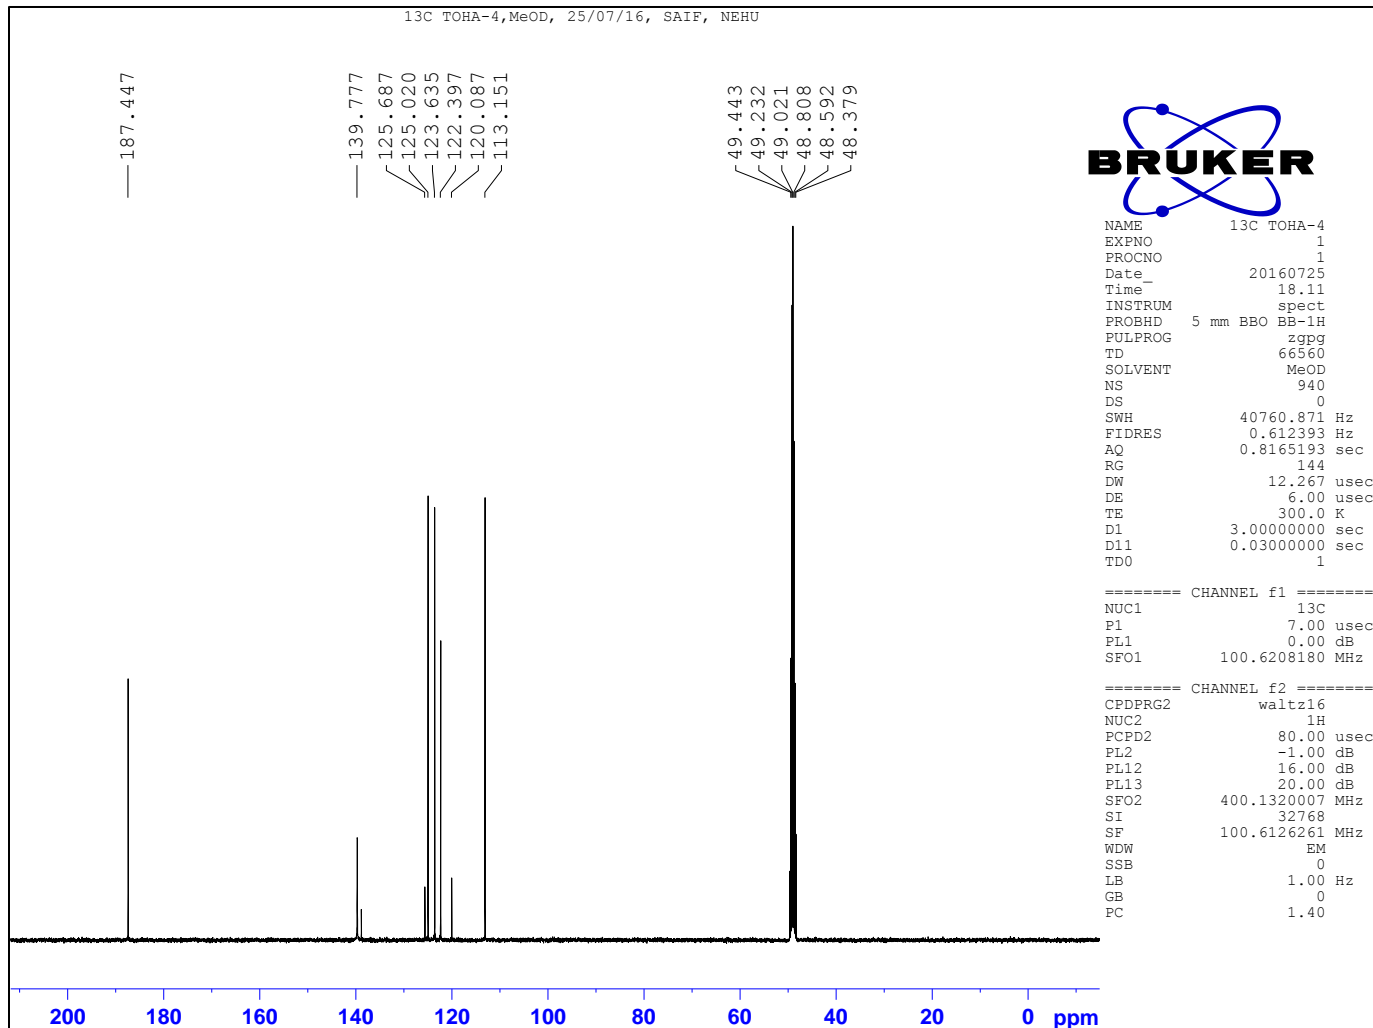

$^{13}\text{C}$  NMR spectrum of compound 3''d
